# Supplementary material for: Fast and Efficient Neural Conversion of Human Hematopoietic Cells
Source: PubMed Central journal article supplement — Stem Cell Reports. 2014 Nov 13;3(6):1118–31. doi: 10.1016/j.stemcr.2014.10.008 (PMC4264063; doi:10.1016/j.stemcr.2014.10.008), 2014-11-13
Supplement: mmc1.pdf [file mmc1.pdf]

**Stem Cell Reports, Volume 3**

**Supplemental Information**

## **Fast and Efficient Neural Conversion of Human**

### **Hematopoietic Cells**

**Julio Castaño, Pablo Menendez, Cristina Bruzos-Cidon, Marco Straccia, Amaia Sousa, Lorea Zabaleta, Nerea Vazquez, Amaia Zubiarrain, Kai-Christian Sonntag, Luisa Ugedo, Xonia Carvajal-Vergara, Josep Maria Canals, Maria Torrecilla, Rosario Sanchez-Pernaute, and Alessandra Giorgetti**

Figure S1

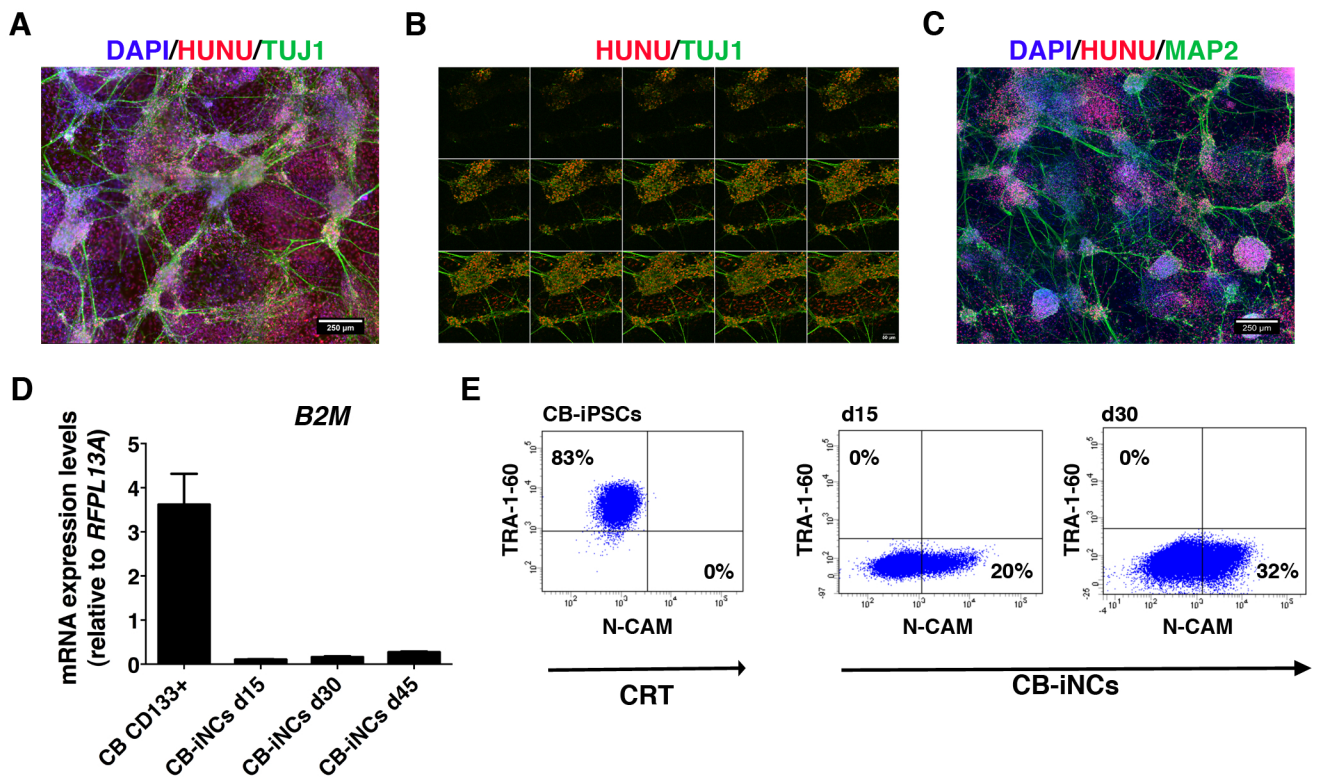

**Figure S2**

**A**

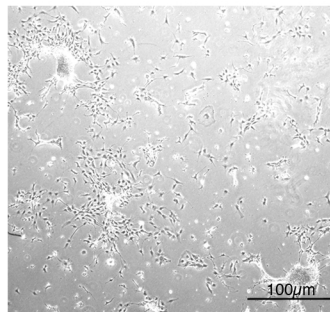

**B**

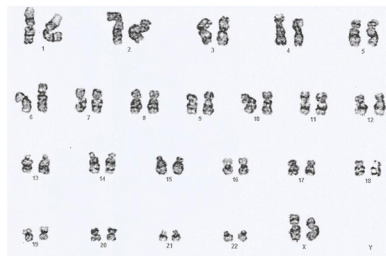

**Figure S3**

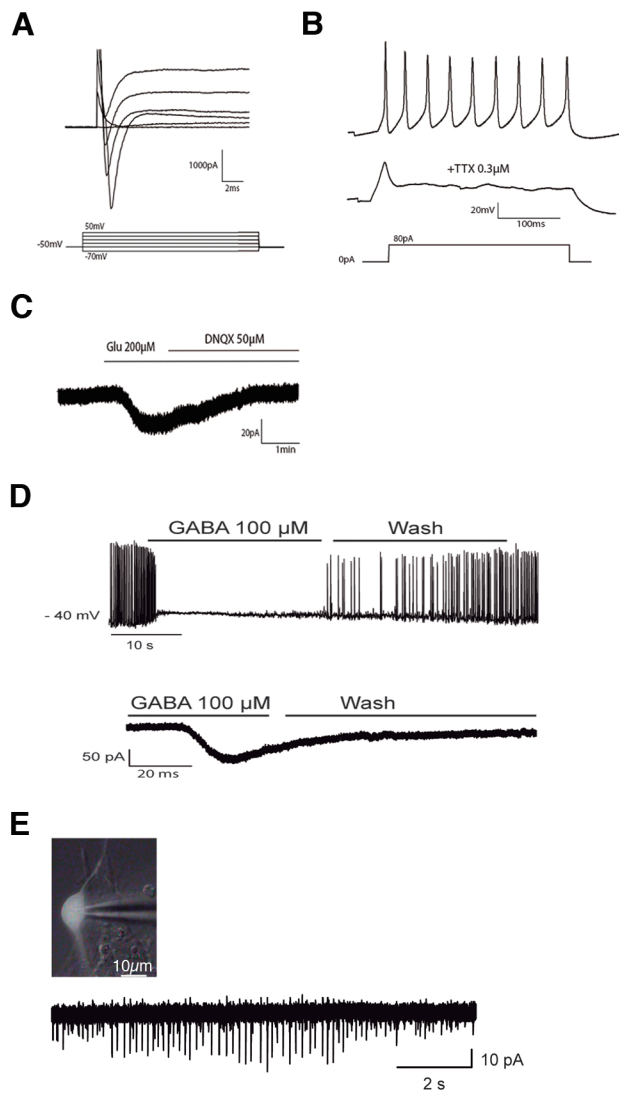

Figure S4

A

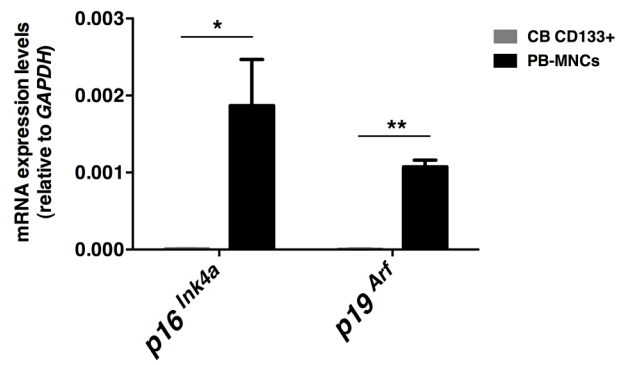

B

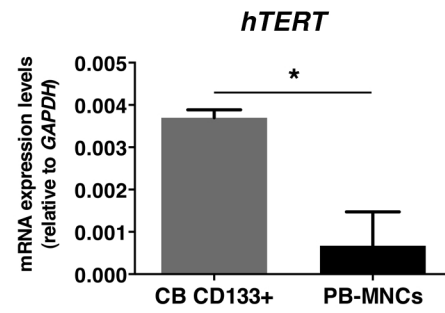

## Supplemental Figure Legends

### Figure S1: CD133-positive CB cells induction into CB-iNCs

(A) Representative immunofluorescence tile image of overall culture morphology at day 30. CB-iNCs expressed the human nuclear antigen (HUNU) and were organized in TUJ1 positive clusters. Scale bar, as indicated in the panel.

(B) Z stack montage of representative CB-iNCs clusters; stacks were used to identify and quantify the number of HUNU/TUJ1 double positive cells at day 30 of neural induction. Scale bar, as indicated in the panel.

(C) Representative immunofluorescence tile image of CB-iNCs at day 30. CB-iNCs expressed the human nuclear antigen (HUNU) and were organized in clusters interconnected by fibres positive for MAP2. Scale bar, as indicated in the panel.

(D) qRT-PCR analysis showing the down-regulation of *B2M* in CB reprogrammed cells. Data are represented as mean  $\pm$  SD (n=3 independent experiments).

(E) Flow cytometry analysis shows absence of TRA-1-60-positive cells within CB-iNCs at days 15 and 30 post-transduction. A CB-iPSC line was used as positive control for expression of TRA-1-60.

### Figure S2: Chromosomal stability of thawed CB-iNCs

(A) Bright field microphotography of live cells after thawing (frozen at passage 7). Scale bar, as indicated in the panel.

(B) Representative high-resolution, G-banded karyotype showing a normal, diploid, female chromosomal content in CB-iNCs cells analysed after 60 passages.

**Figure S3: Whole-cell patch-clamp recordings of CB-iNCs at day 65 of differentiation**

(A) A representative trace of inward Na<sup>+</sup> and outward K<sup>+</sup> voltage-dependent currents triggered upon -70 mV to +50 mV voltage steps ( $V_h = -50$  mV).

(B) Example of action potentials evoked by injecting a depolarizing current step (+80 pA) and the inhibitory effect of the Na<sup>+</sup> channel blocker TTX (0.3  $\mu$ M).

(C) A representative recording of a CB-iN cell from a different CB conversion experiment showing an inward current induced by glutamate and reversed by the non-NMDA receptor antagonist DNQX ( $V_h = -50$  mV). Glutamate response was reliably obtained in all CB experiments, consistent with a high proportion of vGlut1-positive neurons in these conditions.

(D) Current-clamp recording from a CB-iN cell showing the inhibitory effect of GABA (100  $\mu$ M) onto spontaneous action potentials (upper trace). Voltage-clamp recording of the inward current induced by GABA ( $V_h = -50$  mV) (lower trace).

(E) A trace showing spontaneous activity recording from a SYN::GFP positive cell after thawing ( $V_h = -50$  mV). Scale bar, as indicated in the panel.

**Figure S4: Expression of *p16<sup>Ink4a</sup>*, *p19<sup>Arf</sup>* and *hTERT* in CD133-positive CB cells and PB-MNCs**

(A) qRT-PCR analysis for mRNA levels of *p16<sup>Ink4a</sup>* and *p19<sup>Arf</sup>* at day 0 in fresh CD133-positive CB cells and PB-MNCs. Data are represented as mean  $\pm$  SD (n=3 independent experiments).

\*p<0.05; \*\*p<0.001; unpaired, two-tailed t test.

(B) qRT-PCR analysis shows higher level of *hTERT* expression in CD133-positive CB cells when compared with PB-MNCs. Data are represented as mean  $\pm$  SD (n=3 independent experiments). \*p<0.05; unpaired, two-tailed t test.

## Supplemental Tables

Table S1: Primary Antibodies used in this study

| Antibody                     | Source                | Dilution | Supplier                       |
|------------------------------|-----------------------|----------|--------------------------------|
| Doublecortin (DCX) (C-18)    | Goat Polyclonal       | 1:500    | sc- 8066 SCBT                  |
| GABA                         | Rabbit Polyclonal     | 1:500    | A2052 Sigma                    |
| GFAP                         | Rabbit Polyclonal     | 1:500    | Z0334 DakoCytomation           |
| Human nuclei (HUNU)          | Mouse Monoclonal      | 1:200    | MAB1281, Millipore             |
| Ki 67 (MIB1)                 | Mouse Monoclonal      | 1:500    | DAKO                           |
| MAP2                         | Rabbit Polyclonal     | 1: 300   | AB5622 Millipore               |
| MAP2                         | Mouse Monoclonal      | 1:500    | 610460 BD Laboratories         |
| NCAM ( Eric 1)               | Mouse Monoclonal      | 1:100    | sc-106, SCBT                   |
| NESTIN                       | Mouse Monoclonal      | 1:250    | MO15012 Neuromics              |
| NEUN (FOX3)                  | Mouse Monoclonal      | 1:250    | MAB337 Millipore               |
| Neurofilament SMI 312        | Mouse Monoclonal      | 1:500    | NE1016 Calbiochem              |
| PAX6                         | Mouse Monoclonal      | 1:200    | DSHB Iowa University           |
| PSD-95                       | Mouse Monoclonal      | 1:200    | MA1-046 Thermo Fisher          |
| SeV                          | Rabbit Polyclonal     | 1:500    | MBL International Corporation  |
| SNAP25                       | Rabbit Polyclonal     | 1:100    | Ab41455 Abcam                  |
| SOX2                         | Goat Polyclonal       | 1:500    | GT15098 Neuromics              |
| SOX2                         | Goat polyclonal       | 1:300    | AF2018 R&D                     |
| SV2                          | Mouse Monoclonal      | 1:50     | DSH                            |
| Synapsin I                   | Mouse Monoclonal      | 1:100    | Ab57467 Abcam                  |
| TAU (T46)                    | Mouse Monoclonal      | 1:500    | 136400, Invitrogen             |
| vGLUT1                       | Guinea Pig Polyclonal | 1:1000   | AB5905, Chemicon International |
| vGLUT1                       | Rabbit Polyclonal     | 1:500    | 135003 Synaptic systems        |
| $\beta$ - III Tubulin (TUJ1) | Mouse Monoclonal      | 1:1000   | mms-435p, Covance              |
| $\beta$ - III Tubulin (TUJ1) | Rabbit Polyclonal     | 1:500    | ab6046, Abcam                  |
| $\beta$ - III Tubulin (TUJ1) | Rabbit Polyclonal     | 1:1000   | T2200 Sigma                    |



**Table S2: qRT-PCR primers used in this study**

|                   |                                |
|-------------------|--------------------------------|
| <i>BRN2</i> Fw    | 5'-AATAAGGCAAAAGGAAAGCAACT-3'  |
| <i>BRN2</i> Rv    | 5'-CAAACACATCATTACACCTGCT-3'   |
| <i>MAP2</i> Fw    | 5'-TAACCAACCACTGCCAGACCTGAA-3' |
| <i>MAP2</i> Rv    | 5'-GCCACATTTGGATGTCACATGGCT-3' |
| <i>PAX6</i> Fw    | 5'-CCGGCAGAAGATTGTAGAGC-3'     |
| <i>PAX6</i> Rv    | 5'-CGTTGGACACGTTTTGATTG-3'     |
| <i>NEUROD1</i> Fw | 5'-AGCCCAAGGTCCTCCAA-3'        |
| <i>NEUROD1</i> Rv | 5'-CGTGCTCCTCGTCCTGAGA-3'      |
| <i>DCX</i> Fw     | 5'-GCCAGGGAGAACAAGGACTTT-3'    |
| <i>DCX</i> Rv     | 5'-CACCCCACTGCGGATGA-3'        |
| <i>NESTIN</i> Fw  | 5'-GGGAAGAGGTGATGGAACCA-3'     |
| <i>NESTIN</i> Rv  | 5'-AAGCCCTGAACCCTCTTTGC-3'     |
| <i>SOX1</i> Fw    | 5'-TCCCCGCGTGAAGT-3'           |
| <i>SOX1</i> Rv    | 5'-CAAGGCATTTTGCATTACA-3'      |
| <i>SOX2</i> Fw    | 5'-CAAAAATGGCCATGCAGGTT-3'     |
| <i>SOX2</i> Rv    | 5'-AGTTGGGATCGAACAAAAGCTATT-3' |
| <i>MASH1</i> Fw   | 5'-CTGGACTTTACCAACTGGTTCTGA-3' |
| <i>MASH1</i> Rv   | 5'-CCTGCTTCAAAGTCCATTCC-3'     |
| <i>NEUN</i> Fw    | 5'-CCAAGCGGCTACACGTCT -3'      |
| <i>NEUN</i> Rv    | 5'-GCTCGGTCAGCATCTGAG -3'      |
| <i>MUSASHI</i> Fw | 5'-GAGACTGACGCGCCCCAGCC-3'     |
| <i>MUSASHI</i> Rv | 5'-CGCCTGGTCCATGAAAGTGACG-3'   |

|                              |                                     |
|------------------------------|-------------------------------------|
| <i>vGLUT</i> Fw              | 5'-AGCCGCCGCATCATGT-3'              |
| <i>vGLUT</i> Rv              | 5'-GCCTCCGCAGTTCATCAACT-3'          |
| <i>TUJ1</i> Fw               | 5'-AGTCGCCCACGTAGTTGC-3'            |
| <i>TUJ1</i> Rv               | 5'-CGCCCAGTATGAGGGAGAT-3'           |
| <i>TAU</i> Fw                | 5'-CTCCAAAATCAGGGGATCGC-3'          |
| <i>TAU</i> Rv                | 5'-CCTTGCTCAGGTCAACTGGT-3'          |
| <i>OCT4</i> Fw               | 5'-GGGTTTTTGGGATTAAGTTCTTCA-3'      |
| <i>OCT4</i> Rv               | 5'-GCCCCACCCTTTGTGTT-3'             |
| <i>p16<sup>Ink4</sup></i> Fw | 5'-GGGTCGGGTAGAGGAGGTG-3'           |
| <i>p16<sup>Ink4</sup></i> Rv | 5'-ACCGTAACTATTCGGTGCCT-3'          |
| <i>p19<sup>Arf</sup></i> Fw  | 5'-TCTTGGTGACCCTCCGGATT-3'          |
| <i>p19<sup>Arf</sup></i> Rv  | 5'-CGGGATGTGAACCACGAAAAC-3'         |
| <i>TBR</i> Fw                | 5'-CAACTCAGTCAACAGGAAGGC-3'         |
| <i>TBR</i> Rv                | 5'-AAAGATGATCTCCAGCACAGC-3'         |
| <i>SeV</i> Fw                | 5'-GGATCACTAGTGATATCGAGC-3'         |
| <i>SeV</i> Rv                | 5'-ACCAGACAAGAGTTTAAGAGATATGTATC-3' |
| <i>GAPDH</i> Fw              | 5'-GCACCGTCAAGGCTGAGAAC-3'          |
| <i>GAPDH</i> Rv              | 5'-AGGGATCTCGCTCCTGGAA-3'           |

## Supplemental Experimental Procedures

### RNA Purification and Quantitative RT-PCR

Isolation of total RNA from CD133-positive CB cells, CB-iNCs and PB-iNCs was performed using either RNeasy Mini Kit (Qiagen) or RNAqueous-Micro kit (Ambion) based on the cell number available. All RNA samples were treated with TURBO DNase (Ambion) to remove any residual genomic DNA and 1 ug of RNA was used to synthesize cDNA using the SuperScript III Reverse Transcriptase kit (Invitrogen). 25ng of cDNA were used to quantify gene expression by SybrGreen based Quantitative RT-PCR using the primers showed in Table S2 or by IDT primetime qPCR assay for the following genes *B2M* (Hs.PT.39a.22214845), *GAPDH* (Hs.PT.56a.40035104), *GATA4* (Hs.PT.42.776734), *HPRT1* (Hs.PT,51,2145446), *HSP90AB1* (Hs.PT.56a.38913643.gs), *RN18S1* (Hs.PT.39a.22214856.g), *RPL13A* (Hs.PT,51,21531404) and *BRACHYURY (T)* (Hs.PT.42.2366698). GraphPad Prism (v.5.01; GraphPad Software, Inc.) was used for statistical evaluation of the data. All statistical comparisons were made using Student *t* test. The level of significance was considered as  $p \leq 0.05$ .

### Immunofluorescence (IF) analysis.

Cells cultured on coverslips were fixed with 4% paraformaldehyde in 1X PBS for 20 minutes at room temperature (RT). After rinsed with PBS cells were incubated in blocking buffer: 1X PBS with 10% normal donkey serum (Jackson ImmunoResearch) and permeabilized with 0.1% Triton X-100 for 1 hour at RT. Coverslips were then incubated overnight at 4°C with primary antibodies in blocking buffer. After three washes in 1X PBS with 10% normal donkey serum the coverslips were incubated in Alexa Fluor-labelled secondary antibodies for 1 hour at RT and counterstained with Hoechst 33342 (Sigma-Aldrich) or DAPI before mounting using ProLong® antifade reagent (Molecular Probes®, Life Technologies). Stained cells were examined using an LSM510 Meta confocal microscope equipped with ultraviolet, argon, and helium-neon lasers

(Carl Zeiss, NY) and analyzed using Image J (1.42q <http://rsb.info.nih.gov/ij>). For identification of signal co-localization within a cell, optical thickness was kept to a minimum, and orthogonal reconstructions were obtained. On selected coverslips, the primary antibody was omitted to verify the specificity of the staining. Primary antibodies employed are listed in Table S1.

For quantification of the percentage of TUJ-1 and MAP2-positive cells, 50 images for Tuj1 and 192 images for MAP2 were taken randomly by a Leica AF6000 microscope with a 20x magnification objective. The area of each image was 640.8 x 478.88  $\mu\text{m}$ . Manually *Count Objects* software from ImageJ was used to count the total number of HUNU positive nuclei and the TUJ1- and MAP2- double positive cells.

### **Karyotyping**

Standard G-banding technique was performed at the Genetics Unit of Policlínica Gipuzkoa in random samples that were kept in culture for more than 20 passages (Catalina et al., 2008).

### **Supplemental References**

Catalina, P., Montes, R., Ligeró, G., Sanchez, L., de la Cueva, T., Bueno, C., Leone, P.E., and Menendez, P. (2008). Human ESCs predisposition to karyotypic instability: Is a matter of culture adaptation or differential vulnerability among hESC lines due to inherent properties? *Mol Cancer* 7, 76.
